# Supplementary material for: Five genetic variants explain over 70% of hair coat pheomelanin intensity variation in purebred and mixed breed domestic dogs
Source: PubMed Central journal article supplement (PMC8158882; doi:10.1371/journal.pone.0250579), 2021-05-27
Supplement: pone.0250579.s001.pdf [file pone.0250579.s001.pdf]

## S1 Appendix

**S1 Fig. Phenotyping validation on 350 randomly selected dogs**

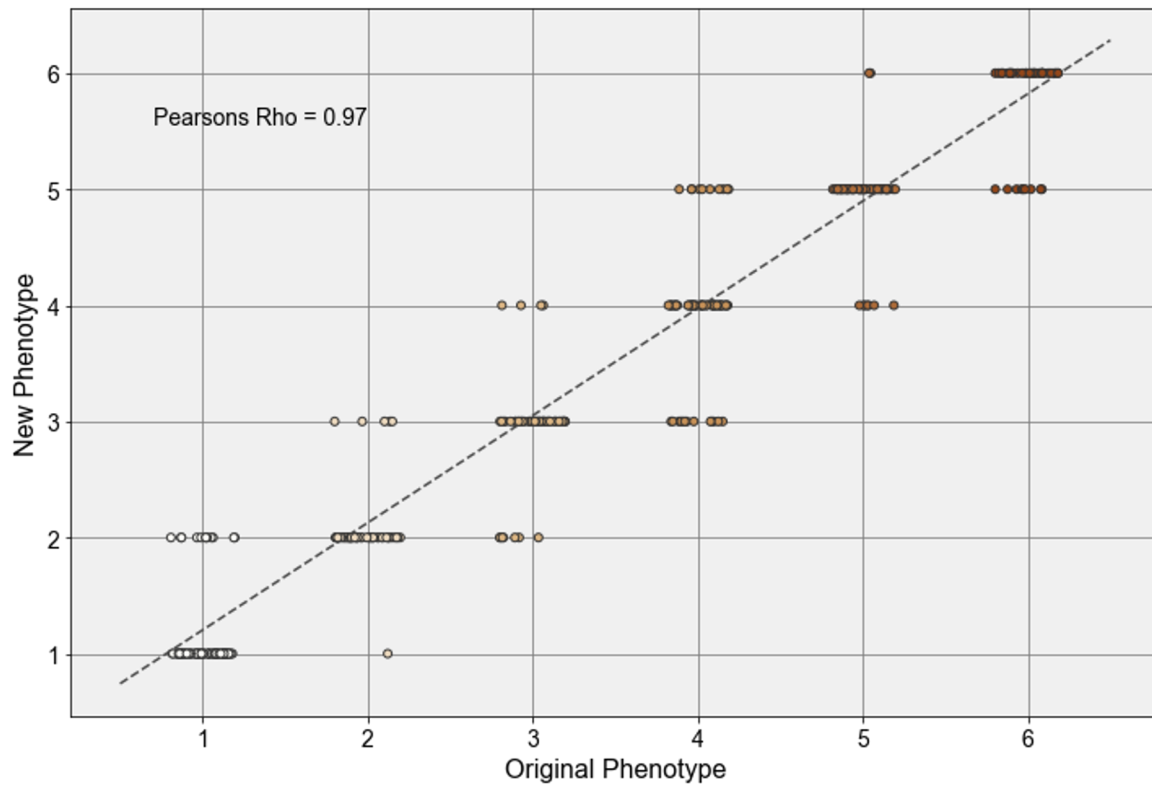

**S1 Fig. Phenotyping validation on 350 randomly selected dogs:** Strip plot showing original versus re-scored 6 point phenotypes for a random sample of 350 dogs from the discovery sample. The correlation coefficient (Pearson's Rho) between the original and new phenotype scores is shown in the upper left hand corner of the plot.

## S2 Fig. Manhattan plots for additional GWAS

### A. 6pt phenotype, no covariates

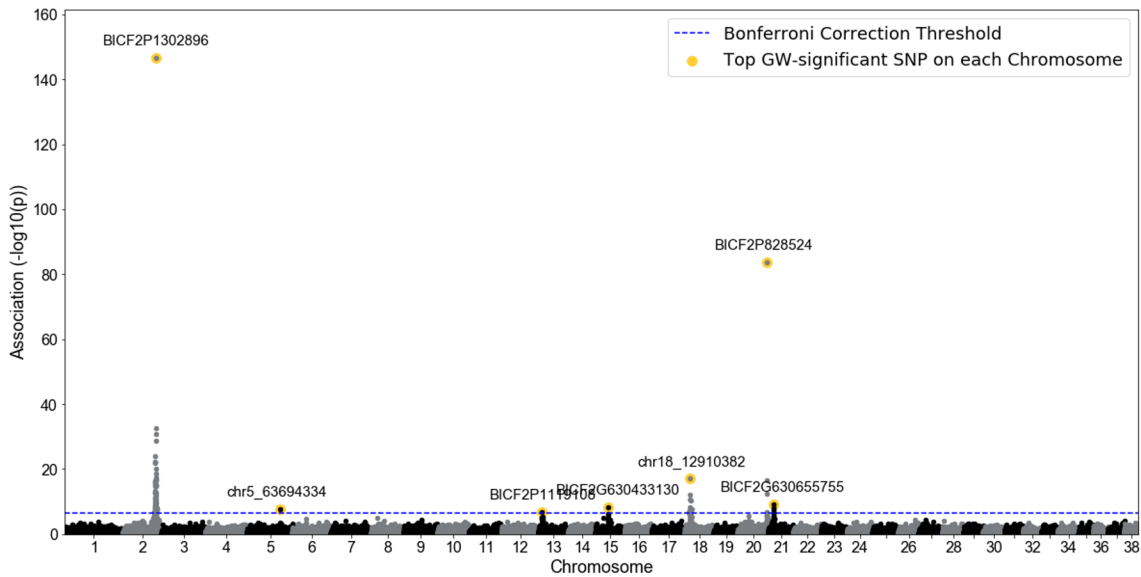

### B. Binary phenotype, with covariates

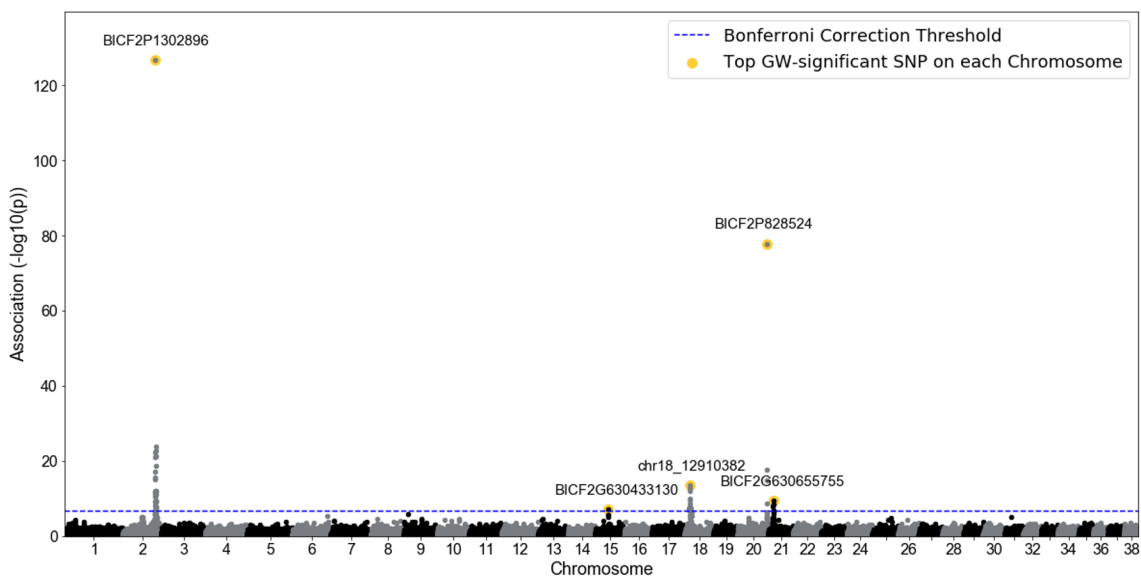

### C. Binary phenotype, no covariates

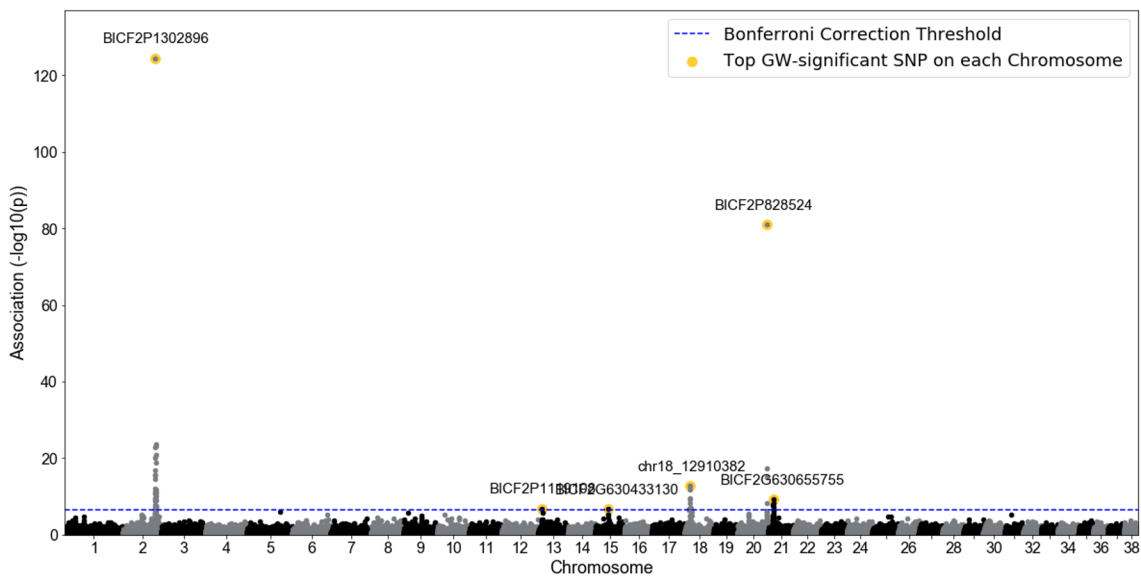

### S3 Fig. Detailed view of regions surrounding top GWAS SNPs

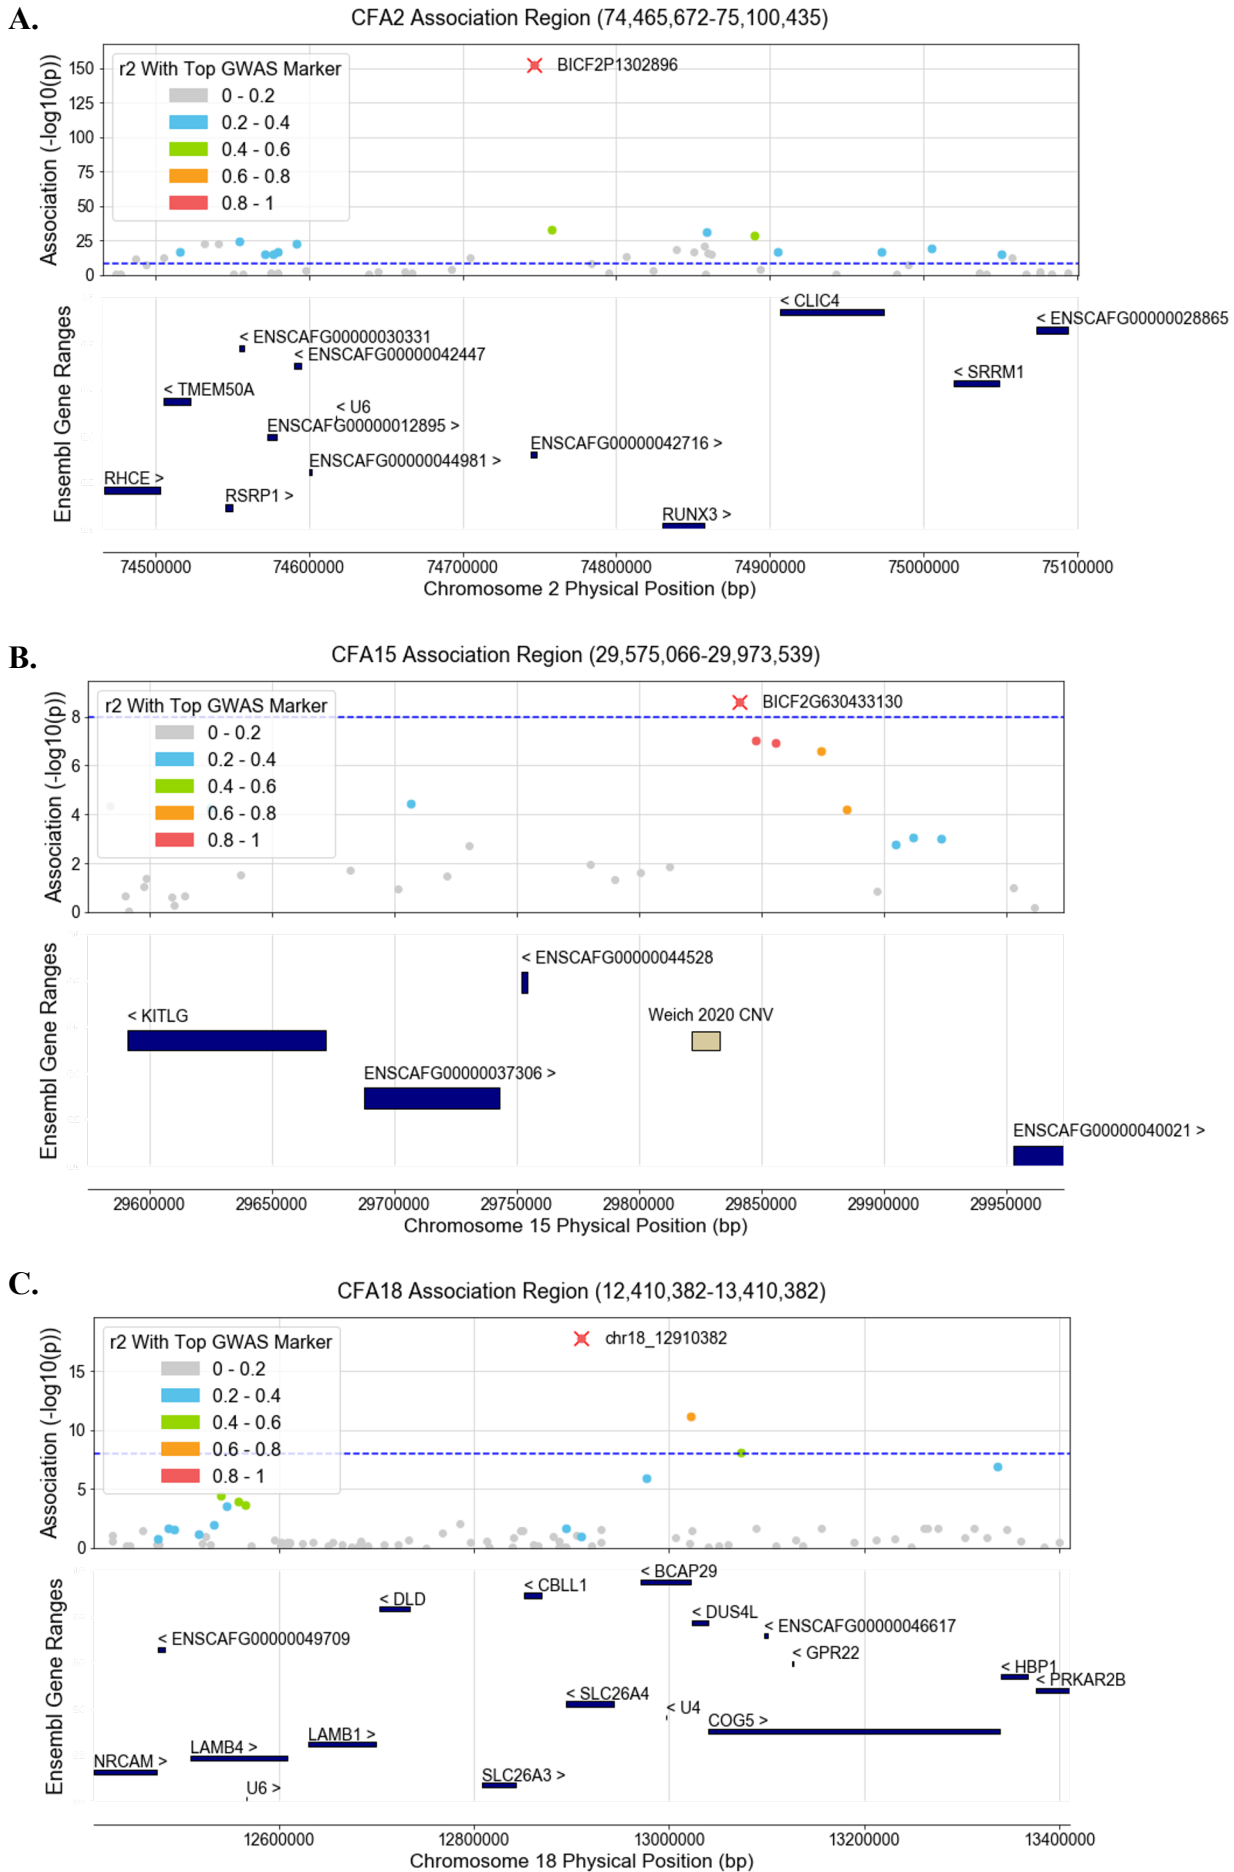

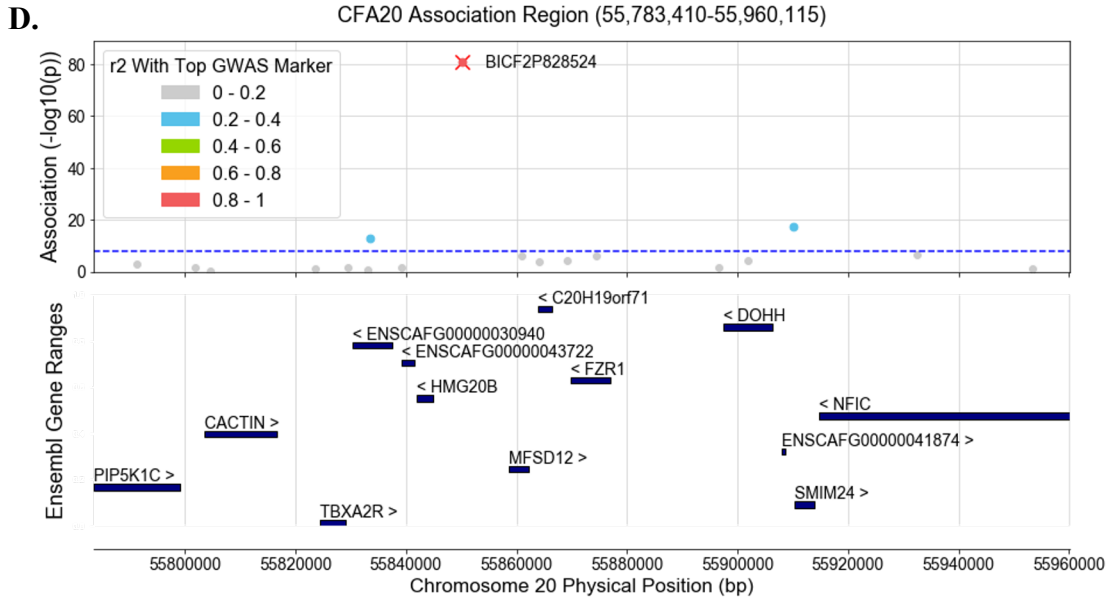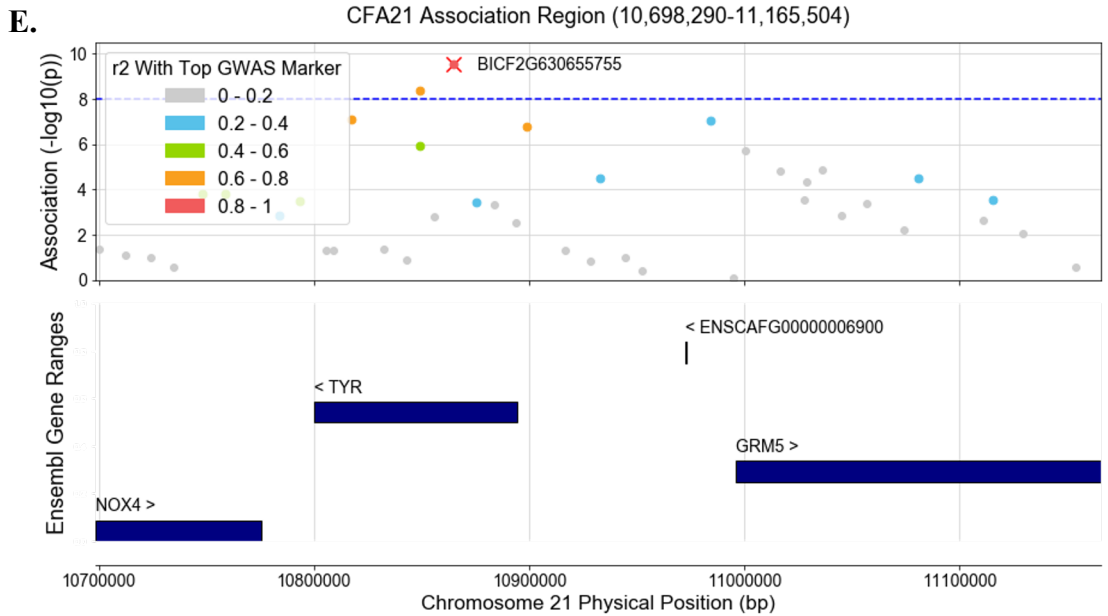

**S3 Fig. Detailed view of regions surrounding the top CFA2 (A), 15 (B), 18 (C), 20 (D), and 21 (e) GWAS markers.** Each panel shows the genomic region defined by the positions of the first upstream marker and last downstream marker with  $r^2 \geq 0.2$  with the most significant GWAS marker on the chromosome (indicated by a red “x”). The top panel of each figure shows the GWAS  $-\log_{10}(p)$ -value) and physical position of all GWAS markers in the region, colored by their  $r^2$  with the top GWAS marker. The bottom panel of each figure shows the canFam3.1 locations of known dog transcripts in this region. Transcription ranges are shown as dark blue rectangles, each of which is labelled with its Ensembl Genes (version 95) [81] transcript or gene name and its strand orientation (“>” = plus strand, “<” = minus strand).

**S4 Fig. CFA15 top marker genotype correlates with sequencing coverage in known CNV**

**A.**

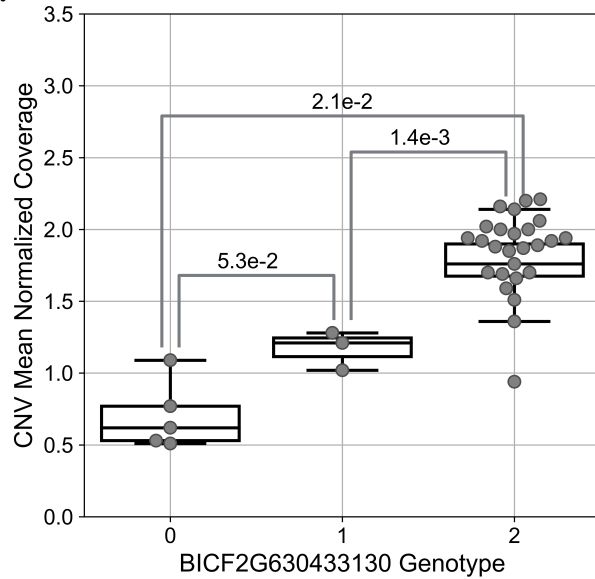

**B.**

| SRA Run ID | Sample Name       | Breed              | BICF2G630433130 Genotype | CNV Read Depth |
|------------|-------------------|--------------------|--------------------------|----------------|
| ERR2196100 | ERR2196100        | Bichon Frisé       | 0                        | 0.51           |
| SRR7120175 | 152721_S5         | Labrador Retriever | 0                        | 0.77           |
| SRR7107894 | SRR7107894        | Golden Retriever   | 0                        | 0.53           |
| SRR7120211 | SRR7120211        | Samoyed            | 0                        | 1.09           |
| SRR2827573 | SRR2827573        | Samoyed            | 0                        | 0.62           |
| SRR7120163 | 173006_S10        | Golden Retriever   | 1                        | 1.02           |
| SRR7120174 | 149323_S6         | Labrador Retriever | 1                        | 1.28           |
| ERR2196098 | ERR2196098        | Bichon Frisé       | 1                        | 1.21           |
| SRR8614086 | SRR8614086        | Irish Setter       | 2                        | 1.94           |
| SRR1784129 | SRR1784129        | NSDTR              | 2                        | 0.94           |
| SRR7107577 | SRR7107577        | Vizsla             | 2                        | 1.59           |
| SRR7120182 | SRR7120182        | Labrador Retriever | 2                        | 1.69           |
| SRR7120161 | SRR7120161        | Golden Retriever   | 2                        | 1.85           |
| SRR2094390 | BrittanySpaniel01 | Brittany           | 2                        | 1.66           |
| SRR8614059 | SRR8614059        | Irish Setter       | 2                        | 1.87           |
| ERR2196099 | ERR2196099        | Bichon Frisé       | 2                        | 1.70           |
| SRR7120176 | 160822_S4         | Labrador Retriever | 2                        | 1.76           |
| SRR7120167 | IrishSetter01     | Irish Setter       | 2                        | 2.14           |
| SRR7120160 | 140447_S11        | Golden Retriever   | 2                        | 2.02           |
| SRR7107980 | CFA.117999        | Labrador Retriever | 2                        | 1.70           |
| SRR7107926 | GoldenRetriever13 | Golden Retriever   | 2                        | 1.36           |
| ERR2196101 | ERR2196101        | Bichon Frisé       | 2                        | 1.92           |
| SRR8614027 | SRR8614027        | Irish Setter       | 2                        | 1.88           |

**S4 Fig. CFA15 top marker genotype correlates with sequencing coverage in known CNV: A.** Boxplots overlaid with strip plots show the distribution of mean normalized depth of coverage across the CFA15 CNV characterized in Weich et al. 2020 [32] (CFA15: 29,821,450-29,832,950 bp) for dogs with each possible BICF2G630433130 genotype. Each point represents a single dog. Kruskal Wallis test p-values are shown for each pair of genotypes. **B.** SRA run ID and sample name, breed, BICF2G630433130 genotype (coded as number of red-associated alleles), and CFA15 CNV mean normalized depth of coverage for all dogs shown in A.
